# Supplementary material for: What Does Recovery Mean in Practice? A Qualitative Analysis of International Recovery-Oriented Practice Guidance
Source: Atypon-hosted journal article supplement (doi:10.1176/appi.ps.001312011), 2011-12-01
Supplement: pss6212_1470_ds.pdf [file pss6212_1470_ds.pdf]

**Online Data Supplement 1**  
**Recovery oriented practice guidance (n=30)**

| <b>Full reference</b> |                                                                                                                                                                                                       |
|-----------------------|-------------------------------------------------------------------------------------------------------------------------------------------------------------------------------------------------------|
| 1                     | Department of Health and Human Services: Achieving the promise: Transforming mental health care in America. Rockville MD, Substance abuse and mental health services administration, 2003.            |
| 2                     | Department of Health: National Service Framework for mental health: Modern standards and service models. London, Department of Health, 1999.                                                          |
| 3                     | Department of Health: The journey to recovery: The government's vision for mental health care. London, Department of Health, 2001.                                                                    |
| 4                     | O'Hagan M: Recovery competencies for New Zealand mental health workers. Wellington, New Zealand Health Commission, 2001.                                                                              |
| 5                     | Department of Health: The ten essential shared capabilities. A framework for the whole of the mental health workforce. London, Department of Health, 2004.                                            |
| 6                     | National Institute of Mental Health England: Emerging best practices in mental health recovery. London, National Institute of Mental Health England, 2004.                                            |
| 7                     | National Institute of Mental Health England: Guiding statement on recovery. London, National Institute of Mental Health England, 2005.                                                                |
| 8                     | Department of Health: From values to action: The chief nursing officer's review of mental health nursing. London, Department of Health, 2006.                                                         |
| 9                     | Scottish Recovery Network & NHS Education for Scotland: Realising recovery: A national framework for learning and training in recovery focused practice. Edinburgh, NHS Education for Scotland, 2007. |
| 10                    | Mental Health Advocacy Coalition: Destination: Recovery. Auckland, Mental Health Foundation of New Zealand, 2008.                                                                                     |

| <b>Full reference</b> |                                                                                                                                                                                                                                                                                            |
|-----------------------|--------------------------------------------------------------------------------------------------------------------------------------------------------------------------------------------------------------------------------------------------------------------------------------------|
| 11                    | Higgins A: A recovery approach within the Irish mental health services: A framework for development. Dublin, Mental Health Commission, 2008.                                                                                                                                               |
| 12                    | Department of Health: High quality care for all: NHS next stage review final report. London, The Stationery Office, 2008.                                                                                                                                                                  |
| 13                    | Sowers W: Transforming systems of care: The American association of community psychiatrists guidelines for recovery oriented services. Community Mental Health Journal 41(6):757-74, 2005.                                                                                                 |
| 14                    | Repper J, Perkins R: The individual's recovery journey: towards a model for mental health practice, in Repper J, Perkins R: Social inclusion and recovery: A model for mental health practice. Edinburgh, Bailliere Tindall, 2003.                                                         |
| 15                    | Davidson L, Tondora J, Staeheli Lawless M, et al: Practice standards for recovery-oriented care, in Davidson L, Tondora J, Staeheli Lawless M, et al: A practical guide to recovery-oriented practice. Tools for transforming mental health care. New York, Oxford University Press, 2009. |
| 16                    | Watkins P: Roads to recovery, in Watkins P: Recovery: A guide for mental health practitioners. Edinburgh, Churchill Livingstone, 2007.                                                                                                                                                     |
| 17                    | Deegan P: Transforming mental health care to support recovery. 2007 <a href="http://www.patdeegan.com">http://www.patdeegan.com</a> Accessed on 10.02.11                                                                                                                                   |
| 18                    | Anthony W: A recovery-oriented service system: Setting some system level standards. Psychiatric Rehabilitation Journal 24(2): 159-68, 2000.                                                                                                                                                |
| 19                    | Roberts G, Wolfson P: The rediscovery of recovery: Open to all. Advances in Psychiatric Treatment 10:37-49, 2004.                                                                                                                                                                          |
| 20                    | Farkas M, Gagne C, Anthony W, et al: Implementing recovery oriented evidence based programs: Identifying the critical dimensions. Community Mental Health Journal 41(2): 141-58, 2005.                                                                                                     |
| 21                    | Farkas MD, Ashcraft L, Anthony W: The 3Cs for recovery services. Behavioral Healthcare 28(2): 26-7, 2008.                                                                                                                                                                                  |

| Full reference |                                                                                                                                                                                                                                                                                                                                                                                                                                             |
|----------------|---------------------------------------------------------------------------------------------------------------------------------------------------------------------------------------------------------------------------------------------------------------------------------------------------------------------------------------------------------------------------------------------------------------------------------------------|
| 22             | Spaniol L: What would a recovery-oriented program look like? The International Journal of Psychosocial Rehabilitation 13(1): 57-66, 2008.                                                                                                                                                                                                                                                                                                   |
| 23             | O'Hagan M: Framework for recovery based system. 2008. <a href="http://www.maryohagan.com">http://www.maryohagan.com</a> Accessed on 10.02.11                                                                                                                                                                                                                                                                                                |
| 24             | Slade M: 100 ways to support recovery: A guide for mental health professionals. London, Rethink, 2009.                                                                                                                                                                                                                                                                                                                                      |
| 25             | Advocates Inc, Deegan PE: Intentional care: Employment performance standards that support recovery and empowerment. MA, Intentional care, 2001.                                                                                                                                                                                                                                                                                             |
| 26             | Erie county office of MH/MR, Department of Human Services: An orientation to mental health recovery. Erie county office of MH/MR, Pennsylvania, 2005. <a href="http://www.recoverie.org">http://www.recoverie.org</a> Accessed on 10.02.11                                                                                                                                                                                                  |
| 27             | Cohen M, Andersen H: Enhanced recovery orientation in psychosocial rehabilitation. City of Aarhus, Department of Social Services, 2007. <a href="http://recovery.foundry.aarhuskommune.dk/English/~media/recovery/English/English_Summary_Master_Plan1.ashx">http://recovery.foundry.aarhuskommune.dk/English/~media/recovery/English/English_Summary_Master_Plan1.ashx</a> Accessed 10.02.11                                               |
| 28             | Devon Partnership NHS Trust: Putting recovery at the heart of all we do: What does this mean in practice? Exeter, Devon Partnership NHS Trust, 2008. <a href="http://www.devonpartnership.nhs.uk/fileadmin/user_upload/publications/info/Putting_Recovery_at_the_heart_of_all_we_do.pdf">http://www.devonpartnership.nhs.uk/fileadmin/user_upload/publications/info/Putting_Recovery_at_the_heart_of_all_we_do.pdf</a> Accessed on 10.02.11 |
| 29             | South London and Maudsley NHS Foundation Trust: Social inclusion, rehabilitation and recovery strategy 2007-2010. London, South London and Maudsley NHS Foundation Trust, 2007. <a href="http://www.slam.nhs.uk">http://www.slam.nhs.uk</a> Accessed on 10.02.11                                                                                                                                                                            |
| 30             | South Staffordshire and Shropshire Healthcare NHS Foundation Trust: Benchmark for recovery oriented approaches assessment tool. South Staffordshire and Shropshire Healthcare NHS Foundation Trust, 2008. <a href="http://www.southstaffshealthcare.nhs.uk">http://www.southstaffshealthcare.nhs.uk</a> Accessed on 10.02.11                                                                                                                |

**SuppT2**  
**Conceptual framework of recovery-oriented practice: categories**

---

**Category 1: Promoting citizenship**

*1.1 Seeing beyond the service user*

1.1.1 Challenge discrimination, stigma and inequality

1.1.1.1 Promote mental well-being in the community

*1.2 Service user rights*

1.2.1 Advocacy

*1.3 Social inclusion*

1.3.1 Housing support

1.3.2 Social network

1.3.3 Community integration

1.3.3.1 Community opportunities

*1.4 Meaningful occupation*

1.4.1 Valued life roles and social roles

1.4.1.2 Identity

1.4.1.2.1 Spirituality

1.4.1.2.2 Giving back to others

1.4.1.2.3 Employment and training

---

**Category 2: Organizational commitment**

*2.1 Recovery vision*

*2.2 Workplace support structures*

2.2.1 Leadership

2.2.2 Policies and procedures

*2.3 Quality improvement*

2.3.1 Services are directed by and responsive to service users, families and carers

2.3.2 Routine evaluation and service improvement

*2.4 Care pathway*

2.4.1 Service accessibility

2.4.1.1 Location and physical environment

2.4.1.2 Continuity of care

2.4.1.3 Long-term commitment

2.4.2 Inter-agency working

*2.5 Workforce planning*

2.5.1 Workforce diversity representative of community it serves

2.5.2 Recruitment guided by recovery values

2.5.3 Staff support

2.5.3.1 Staff knowledge, skills and values

2.5.3.1.1 Lifelong learning and reflective practice

2.5.3.1.2 Evidence based practice

2.5.3.1.3 Supervision and appraisal

- 2.5.3.2 Staff health and wellbeing
  - 2.5.3.2.1 Foster hope and optimism in staff
- 

### **Category 3: Supporting personally defined recovery**

#### *3.1 Individuality*

- 3.1.1 Empowerment and self-determination
- 3.1.2 Personalisation

#### *3.2 Informed choice*

- 3.2.1 Access to information and options
- 3.2.2 Personal choice
- 3.2.3 Shared decision-making
- 3.2.4 Goal striving
  - 3.2.4.1 Goal attainment
  - 3.2.4.2 Celebrate achievements
- 3.2.5 Positive risk taking
  - 3.2.5.1 The right to make mistakes

#### *3.3 Peer support*

- 3.3.1 Self-management
  - 3.3.1.1 Access to resources
- 3.3.2 Recovery narratives

#### *3.4 Strengths focus*

- 3.4.1 Natural supports

#### *3.5 Holistic approach*

- 3.5.1 Wellness and crisis planning
    - 3.5.1.1 Mental well-being
    - 3.5.1.2 Physical well-being
    - 3.5.1.3 Dual diagnosis
    - 3.5.1.4 Medication
    - 3.5.1.5 Psychological therapies
    - 3.5.1.6 Alternative therapies
    - 3.5.1.7 Advance directives
  - 3.5.2 Care co-ordination
- 

### **Category 4: Working relationship**

#### *4.1 Partnerships*

- 4.1.1 Service user independence and autonomy
  - 4.1.1.1 Respect and value people as individuals
- 4.1.2 Work creatively
  - 4.1.2.1 Support stages of engagement
  - 4.1.2.2 Promote risk self-management
  - 4.1.2.3 Reduce coercion

#### *4.2 Inspiring hope*

- 4.2.1 Service user primacy
- 4.2.2 Value and believe in service users
